# Supplementary material
Source: PubMed Central journal article supplement (PMC6556837)
Supplement: mmc1.pdf [file mmc1.pdf]

## Supplemental Data

### Heterozygous Variants in *KMT2E* Cause a Spectrum of Neurodevelopmental Disorders and Epilepsy

Anne H. O'Donnell-Luria, Lynn S. Pais, Víctor Faundes, Jordan C. Wood, Abigail Sveden, Victor Luria, Rami Abou Jamra, Andrea Accogli, Kimberly Amburgey, Britt Marie Anderlid, Silvia Azzarello-Burri, Alice A. Basinger, Claudia Bianchini, Lynne M. Bird, Rebecca Buchert, Wilfrid Carre, Sophia Ceulemans, Perrine Charles, Helen Cox, Lisa Culliton, Aurora Currò, Deciphering Developmental Disorders (DDD) Study, Florence Demurger, James J. Dowling, Benedicte Duban-Bedu, Christèle Dubourg, Saga Elise Eiset, Luis F. Escobar, Alessandra Ferrarini, Tobias B. Haack, Mona Hashim, Solveig Heide, Katherine L. Helbig, Ingo Helbig, Raul Heredia, Delphine Héron, Bertrand Isidor, Amy R. Jonasson, Pascal Joset, Boris Keren, Fernando Kok, Hester Y. Kroes, Alinoë Lavillaureix, Xin Lu, Saskia M. Maas, Gustavo H.B. Maegawa, Carlo L.M. Marcelis, Paul R. Mark, Marcelo R. Masruha, Heather M. McLaughlin, Kirsty McWalter, Esther U. Melchinger, Saadet Mercimek-Andrews, Caroline Nava, Manuela Pendziwiat, Richard Person, Gian Paolo Ramelli, Luiza L.P. Ramos, Anita Rauch, Caitlin Reavey, Alessandra Renieri, Angelika Rieß, Amarilis Sanchez-Valle, Shifteh Sattar, Carol Saunders, Niklas Schwarz, Thomas Smol, Myriam Srouf, Katharina Steindl, Steffen Syrbe, Jenny C. Taylor, Aida Telegrafi, Isabelle Thiffault, Doris A. Trauner, Helio van der Linden Jr., Silvana van Koningsbruggen, Laurent Villard, Ida Vogel, Julie Vogt, Yvonne G. Weber, Ingrid M. Wentzensen, Elysa Widjaja, Jaroslav Zak, Samantha Baxter, Siddharth Banka, and Lance H. Rodan

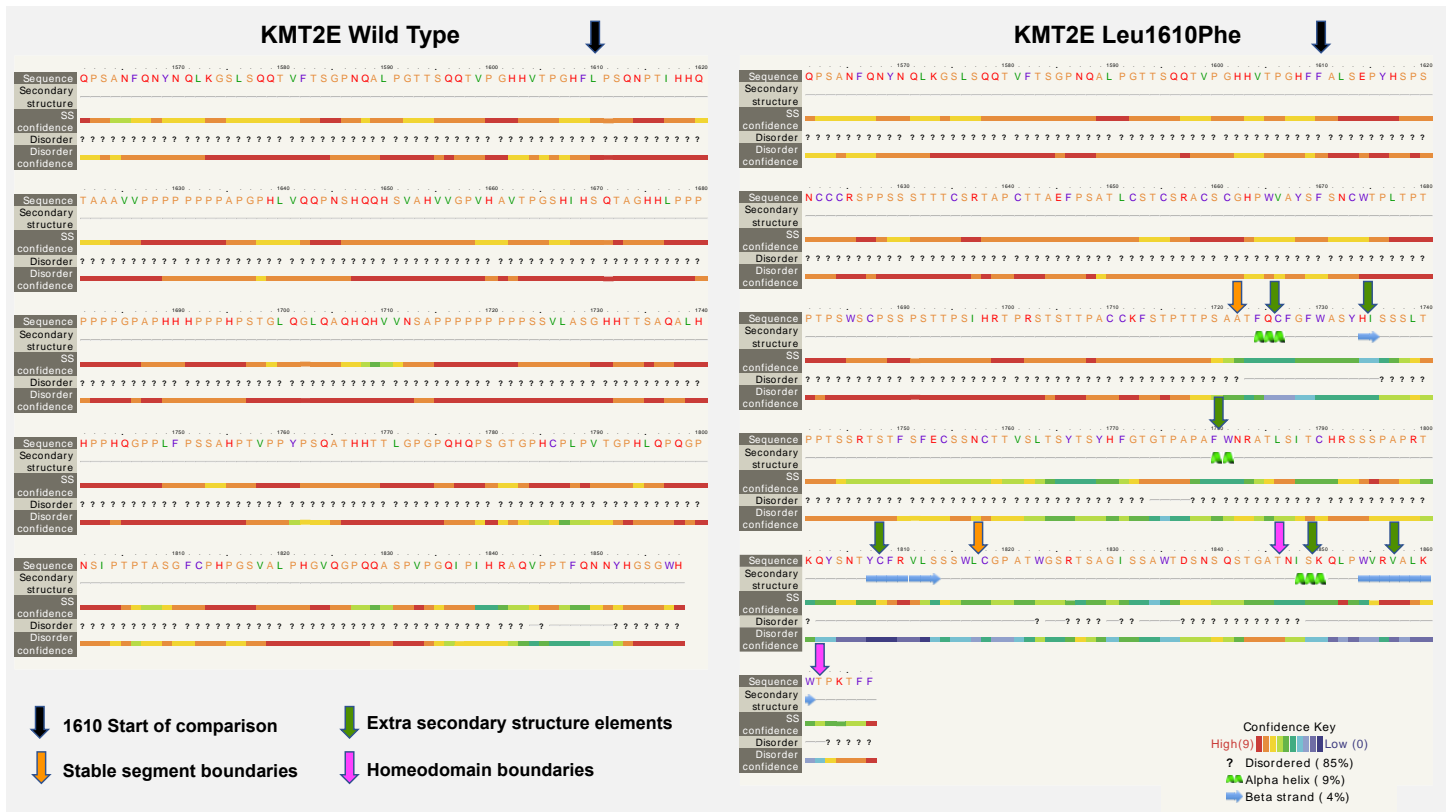

**Figure S1. Frameshifting variants acquire stabilizing secondary structure elements.** PHYRE<sup>19</sup> secondary structure report for the C-terminal fragments of KMT2E wild type (left panel, amino acids 1560-1858) and KMT2E frameshifting variant Leu1610Phe (right panel, amino acids 1560-1867). Black arrows indicate the start of comparison at position 1610, after which the two variants are completely different due to a frameshift variant. The orange arrows indicate the boundaries of the stabilizing segment present in p.Leu1610Phefs\*259 and p.Val1625Argfs\*244 but not in wild type. The green arrows indicate the helices and strands not present in wild type. The pink arrows indicate the boundaries of the C-terminal predicted homeodomain present in p.Leu1610Phefs\*259 and p.Val1625Argfs\*244 but not in wild type. The confidence key (bottom right) indicates the reliability of secondary structure prediction (helix, strand, disorder) at each position.
